# Supplementary material for: A Dedicated Mycosis Flask Increases the Likelihood of Identifying Candidemia Sepsis
Source: MDPI journal article supplement (doi:10.3390/jof9040441), 2023-04-04
Supplement: s1 [file s1]

| Table S1: Blood culture system used by the different hospitals and departments in 2018 and 2020                                                                             |                                                                                                                                                                                                  |                                                                                                                                                                                |
|-----------------------------------------------------------------------------------------------------------------------------------------------------------------------------|--------------------------------------------------------------------------------------------------------------------------------------------------------------------------------------------------|--------------------------------------------------------------------------------------------------------------------------------------------------------------------------------|
| <b>Department of clinical microbiology</b>                                                                                                                                  | <b>Hospitals serviced in 2018, blood culture system*</b>                                                                                                                                         | <b>Hospitals serviced in 2020, blood culture system**</b>                                                                                                                      |
| Rigshospitalet                                                                                                                                                              | Rigshospitalet, BACTEC                                                                                                                                                                           | Rigshospitalet, BACTEC                                                                                                                                                         |
| Herlev                                                                                                                                                                      | Gentofte Hospital, BACTEC<br>Herlev Hospital, BACTEC<br>Nordsjællands hospitaler, BacTAlert                                                                                                      | Gentofte Hospital, BACTEC<br>Herlev Hospital, BACTEC<br>Nordsjællands hospitaler, BACTEC                                                                                       |
| Hvidovre                                                                                                                                                                    | Amager Hospital, BacTAlert<br>Bispebjerg Hospital, BacTAlert<br>Bornholm sygehus, BacTAlert<br>Frederiksberg Hospital, BacTAlert<br>Glostrup Hospital, BacTAlert<br>Hvidovre Hospital, BacTAlert | Amager Hospital, BACTEC<br>Bispebjerg Hospital, BACTEC<br>Bornholm sygehus, BACTEC<br>Frederiksberg Hospital, BACTEC<br>Glostrup Hospital, BACTEC<br>Hvidovre Hospital, BACTEC |
| * Standard blood culture set consisted of two aerobic and two anaerobic flasks<br>** Standard blood culture set consisted of two aerob, one anaerobic and one mycosis flask |                                                                                                                                                                                                  |                                                                                                                                                                                |
